# Supplementary material for: Relationship of the Phytochemicals from Coffee and Cocoa By-Products with their Potential to Modulate Biomarkers of Metabolic Syndrome In Vitro
Source: PubMed Central journal article supplement (PMC6721099; doi:10.3390/antiox8080279), 2019-08-05
Supplement: antioxidants-08-00279-s001.pdf [file antioxidants-08-00279-s001.pdf]

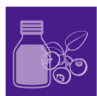

*Supplementary Material*

# **Relationship of the Phytochemicals from Coffee and Cocoa By-Products with their Potential to Modulate Biomarkers of Metabolic Syndrome *In Vitro***

**Miguel Rebollo-Hernanz**<sup>1,2,3</sup>, **Qiaozhi Zhang**<sup>3,4</sup>, **Yolanda Aguilera**<sup>1,2</sup>, **Maria A. Martín-Cabrejas**<sup>1,2</sup>, **Elvira Gonzalez de Mejia**<sup>3\*</sup>

<sup>1</sup> Institute of Food Science Research, CIAL (UAM-CSIC), 28049, Madrid, Spain.

<sup>2</sup> Department of Agricultural Chemistry and Food Science, Universidad Autónoma de Madrid, 28049, Madrid, Spain.

<sup>3</sup> Department of Food Science and Human Nutrition, University of Illinois at Urbana-Champaign, IL 61801, United States.

<sup>4</sup> College of Food Science and Biotechnology, Zhejiang Gongshang University, Hangzhou, 310000, China.

\* Correspondence: edemejia@illinois; Tel.: +1-217-244-3196 (E.G.d.M.)

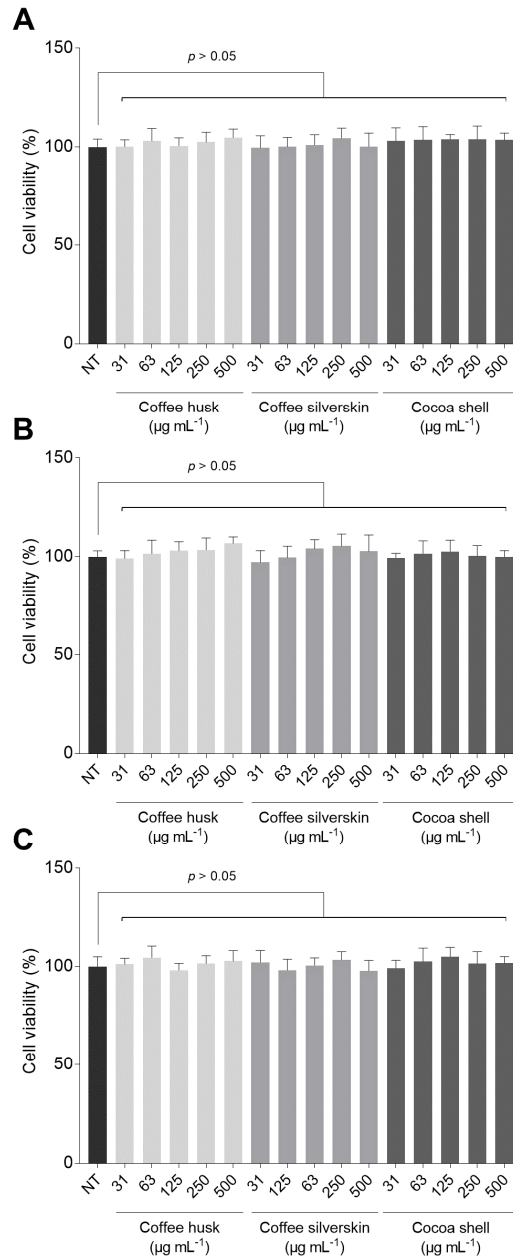

**Figure S1.** Impact of treatments on cell viability of (A) RAW264.7 macrophages, (B) 3T3-L1 preadipocytes, and (C) 3T3-L1 differentiated adipocytes. Cells were treated in the absence (NT) or presence of coffee husk, coffee silverskin, or cocoa shell aqueous extracts (31-500  $\mu\text{g mL}^{-1}$ ) for 24 h, after which, the cell viability was determined using an MTS colorimetric assay. The results are expressed as mean  $\pm$  SD ( $n = 3$ ). NT: non-treated cells.

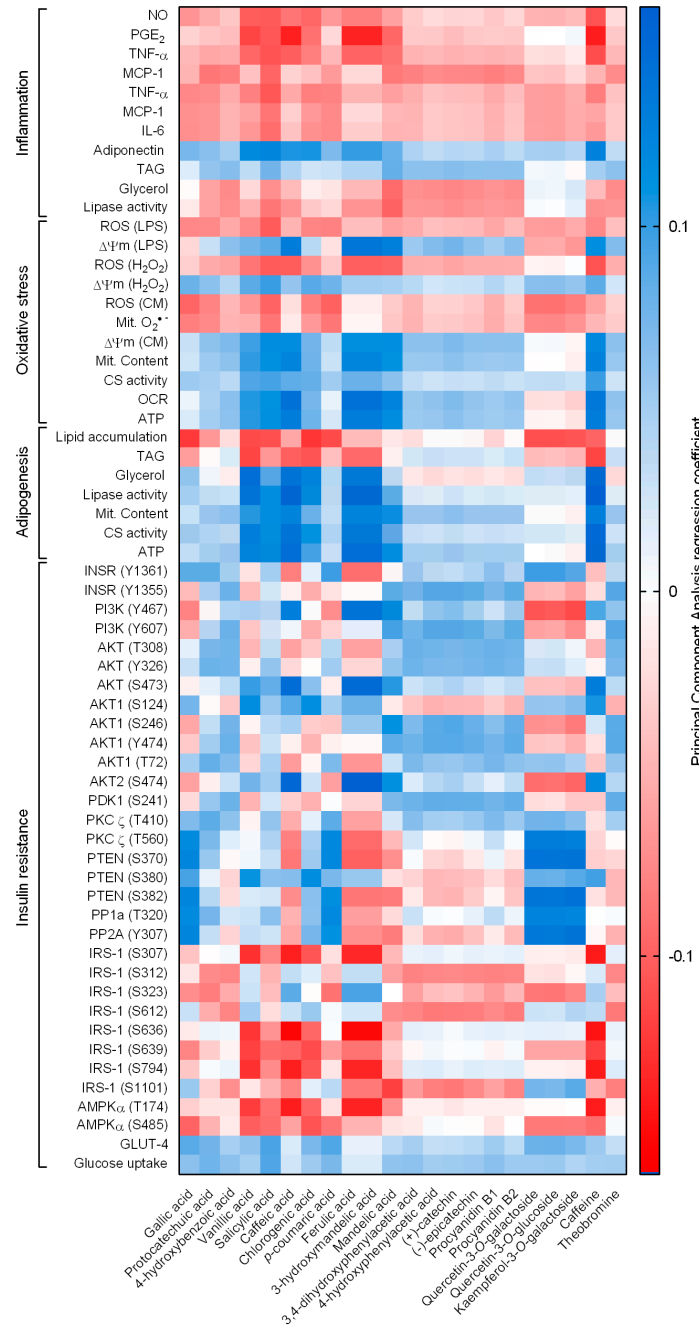

**Figure S2.** Heat map including standardized principal component regression (PCR) coefficient of the regression constructed among the phytochemicals found in coffee husk, coffee silverskin, and cocoa shell aqueous extracts and the potential of the extracts in the different biomarkers of inflammation, oxidative stress, adipogenesis, and insulin resistance.

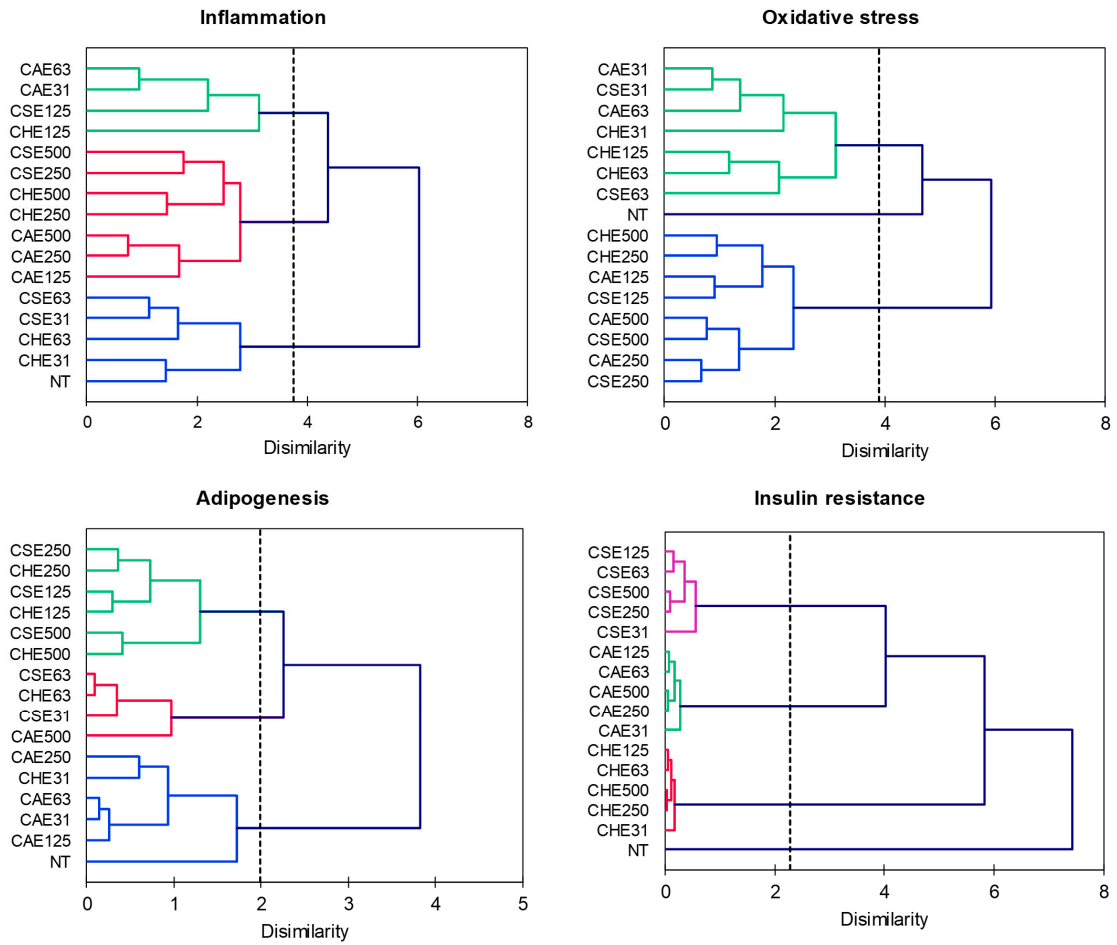

**Figure S3.** Dendrograms of hierarchical cluster analysis of the treatments of coffee husk (CHE), coffee silverskin (CSE), and cocoa shell (CAE) on the different in vitro models of inflammation, oxidative stress, adipogenesis, and insulin resistance. All the variables in each group of biological activity were included. NT: non-treated cells

**Table S1.** Anti-inflammatory effect of coffee husk, coffee silverskin, and cocoa shell extracts regulating NO, PGE2, TNF- $\alpha$ , and MCP-1 release in LPS-stimulated RAW264.7 macrophages, and TNF- $\alpha$ , MCP-1, IL-6, adiponectin, intracellular triglyceride content, extracellular glycerol release, and lipase activity CM-stimulated in 3T3-L1 adipocytes. Values are expressed as mean  $\pm$  SD ( $n = 3$ ). Different letters among rows (same concentration) indicate significant differences ( $p < 0.05$ ) according to ANOVA and Tukey's multiple range test.

|                                                        |     | <i>RAW264.7 macrophages</i>               |                                          |                                                       |                                           | <i>3T3-L1 adipocytes</i>                  |                                           |                                           |                                          |                                            |                                           |                                            |
|--------------------------------------------------------|-----|-------------------------------------------|------------------------------------------|-------------------------------------------------------|-------------------------------------------|-------------------------------------------|-------------------------------------------|-------------------------------------------|------------------------------------------|--------------------------------------------|-------------------------------------------|--------------------------------------------|
|                                                        |     | NO release                                | PGE2 release                             | TNF- $\alpha$ release                                 | MCP-1 release                             | TNF- $\alpha$ release                     | MCP-1 release                             | IL-6 release                              | Adiponectin release                      | TAG content                                | Glycerol release                          | Lipase activity                            |
| <b>NT</b>                                              |     | 100.0 $\pm$ 5.3 <sup>z</sup>              | 100.0 $\pm$ 3.9 <sup>z</sup>             | 100.0 $\pm$ 2.7 <sup>z</sup>                          | 100.0 $\pm$ 12.2 <sup>z</sup>             | 100.0 $\pm$ 3.4 <sup>z</sup>              | 100.0 $\pm$ 8.2 <sup>z</sup>              | 100.0 $\pm$ 7.1 <sup>z</sup>              | 0.0 $\pm$ 0.6 <sup>z</sup>               | 0.0 $\pm$ 3.9 <sup>z</sup>                 | 100.0 $\pm$ 2.5 <sup>z</sup>              | 100.0 $\pm$ 10.8 <sup>z</sup>              |
| <b>Coffee husk (<math>\mu\text{g/mL}</math>)</b>       | 31  | 57.6 $\pm$ 5.7 <sup>y</sup>               | 78.7 $\pm$ 2.5 <sup>a</sup> <sup>y</sup> | 78.0 $\pm$ 3.9 <sup>b</sup> <sup>y</sup>              | 84.2 $\pm$ 2.0 <sup>b</sup> <sup>y</sup>  | 69.6 $\pm$ 5.5 <sup>a</sup> <sup>y</sup>  | 52.8 $\pm$ 3.5 <sup>a</sup> <sup>y</sup>  | 75.0 $\pm$ 0.3 <sup>a</sup> <sup>y</sup>  | 8.0 $\pm$ 1.4 <sup>b</sup> <sup>y</sup>  | 23.3 $\pm$ 6.2 <sup>a</sup> <sup>y</sup>   | 81.7 $\pm$ 7.9 <sup>b</sup> <sup>y</sup>  | 91.1 $\pm$ 2.7 <sup>z</sup>                |
|                                                        | 63  | 51.5 $\pm$ 6.0 <sup>a</sup> <sup>yx</sup> | 69.2 $\pm$ 1.6 <sup>a</sup> <sup>x</sup> | 71.4 $\pm$ 3.9 <sup>b</sup> <sup>x</sup>              | 72.6 $\pm$ 3.9 <sup>b</sup> <sup>x</sup>  | 57.3 $\pm$ 0.2 <sup>a</sup> <sup>x</sup>  | 46.5 $\pm$ 3.2 <sup>a</sup> <sup>yx</sup> | 72.9 $\pm$ 0.1 <sup>a</sup> <sup>x</sup>  | 20.6 $\pm$ 8.0 <sup>b</sup> <sup>x</sup> | 59.9 $\pm$ 5.2 <sup>a</sup> <sup>x</sup>   | 77.1 $\pm$ 8.1 <sup>c</sup> <sup>y</sup>  | 79.0 $\pm$ 7.5 <sup>b</sup> <sup>y</sup>   |
|                                                        | 125 | 40.2 $\pm$ 6.2 <sup>a</sup> <sup>x</sup>  | 65.4 $\pm$ 2.0 <sup>b</sup> <sup>x</sup> | 69.1 $\pm$ 5.4 <sup>b</sup> <sup>x</sup>              | 55.0 $\pm$ 3.0 <sup>b</sup> <sup>w</sup>  | 48.2 $\pm$ 0.1 <sup>a</sup> <sup>w</sup>  | 42.9 $\pm$ 4.8 <sup>a</sup> <sup>x</sup>  | 67.9 $\pm$ 1.0 <sup>a</sup> <sup>w</sup>  | 36.0 $\pm$ 4.7 <sup>a</sup> <sup>w</sup> | 63.2 $\pm$ 3.8 <sup>a</sup> <sup>x</sup>   | 56.3 $\pm$ 4.5 <sup>c</sup> <sup>x</sup>  | 60.6 $\pm$ 15.2 <sup>b</sup> <sup>yx</sup> |
|                                                        | 250 | 30.6 $\pm$ 3.1 <sup>a</sup> <sup>w</sup>  | 58.9 $\pm$ 3.9 <sup>c</sup> <sup>w</sup> | 63.7 $\pm$ 6.8 <sup>a</sup> <sup>xw</sup>             | 49.1 $\pm$ 6.1 <sup>b</sup> <sup>w</sup>  | 47.4 $\pm$ 0.4 <sup>a</sup> <sup>v</sup>  | 38.4 $\pm$ 4.7 <sup>a</sup> <sup>wx</sup> | 62.6 $\pm$ 0.1 <sup>a</sup> <sup>v</sup>  | 52.3 $\pm$ 4.7 <sup>a</sup> <sup>v</sup> | 83.2 $\pm$ 6.1 <sup>a</sup> <sup>w</sup>   | 52.1 $\pm$ 9.9 <sup>b</sup> <sup>x</sup>  | 48.2 $\pm$ 10.8 <sup>a</sup> <sup>xw</sup> |
|                                                        | 500 | 22.7 $\pm$ 3.2 <sup>a</sup> <sup>v</sup>  | 52.7 $\pm$ 0.9 <sup>c</sup> <sup>v</sup> | 54.4 $\pm$ 4.5 <sup>b</sup> <sup>w</sup>              | 36.6 $\pm$ 6.2 <sup>b</sup> <sup>v</sup>  | 38.3 $\pm$ 1.4 <sup>a</sup> <sup>u</sup>  | 36.4 $\pm$ 3.8 <sup>b</sup> <sup>w</sup>  | 60.5 $\pm$ 0.1 <sup>a</sup> <sup>u</sup>  | 71.9 $\pm$ 4.4 <sup>a</sup> <sup>u</sup> | 96.5 $\pm$ 6.9 <sup>a</sup> <sup>w</sup>   | 51.1 $\pm$ 7.4 <sup>b</sup> <sup>x</sup>  | 41.0 $\pm$ 3.9 <sup>c</sup> <sup>w</sup>   |
| <b>EC<sub>50</sub> (<math>\mu\text{g/mL}</math>)</b>   |     | 73.4 $\pm$ 8.9 <sup>a</sup>               | 312.6 $\pm$ 48.4 <sup>b</sup>            | 370.4 $\pm$ 61.7 <sup>a</sup>                         | 203.5 $\pm$ 17.7 <sup>b</sup>             | 139.5 $\pm$ 21.9 <sup>a</sup>             | 80.0 $\pm$ 16.6 <sup>a</sup>              | > 500                                     | 225.4 $\pm$ 14.3 <sup>a</sup>            | 60.3 $\pm$ 10.0 <sup>b</sup>               | 265.7 $\pm$ 42.2 <sup>c</sup>             | 249.8 $\pm$ 29.7 <sup>c</sup>              |
| <b>Coffee silverskin (<math>\mu\text{g/mL}</math>)</b> | 31  | 77.0 $\pm$ 4.9 <sup>b</sup> <sup>y</sup>  | 77.4 $\pm$ 3.4 <sup>a</sup> <sup>y</sup> | 85.9 $\pm$ 8.7 <sup>b</sup> <sup>y</sup>              | 92.0 $\pm$ 9.7 <sup>c</sup> <sup>z</sup>  | 92.0 $\pm$ 1.5 <sup>b</sup> <sup>y</sup>  | 62.9 $\pm$ 4.2 <sup>b</sup> <sup>y</sup>  | 79.0 $\pm$ 6.1 <sup>a</sup> <sup>y</sup>  | 2.1 $\pm$ 1.6 <sup>a</sup> <sup>z</sup>  | 53.2 $\pm$ 5.3 <sup>b</sup> <sup>y</sup>   | 92.9 $\pm$ 9.9 <sup>c</sup> <sup>y</sup>  | 87.7 $\pm$ 7.7 <sup>b</sup> <sup>z</sup>   |
|                                                        | 63  | 55.4 $\pm$ 5.8 <sup>a</sup> <sup>x</sup>  | 63.9 $\pm$ 4.3 <sup>a</sup> <sup>x</sup> | 74.1 $\pm$ 5.6 <sup>b</sup> <sup>yx</sup>             | 80.8 $\pm$ 8.3 <sup>b</sup> <sup>y</sup>  | 79.4 $\pm$ 5.9 <sup>b</sup> <sup>x</sup>  | 60.4 $\pm$ 5.4 <sup>b</sup> <sup>y</sup>  | 73.5 $\pm$ 1.0 <sup>a</sup> <sup>yx</sup> | 10.3 $\pm$ 2.8 <sup>a</sup> <sup>y</sup> | 63.2 $\pm$ 4.8 <sup>a</sup> <sup>x</sup>   | 69.2 $\pm$ 4.0 <sup>b</sup> <sup>x</sup>  | 72.4 $\pm$ 5.6 <sup>b</sup> <sup>y</sup>   |
|                                                        | 125 | 45.3 $\pm$ 4.1 <sup>a</sup> <sup>x</sup>  | 50.9 $\pm$ 2.2 <sup>a</sup> <sup>w</sup> | 71.1 $\pm$ 6.6 <sup>b</sup> <sup>x</sup>              | 71.9 $\pm$ 6.3 <sup>c</sup> <sup>yx</sup> | 69.3 $\pm$ 6.2 <sup>c</sup> <sup>xw</sup> | 57.4 $\pm$ 4.0 <sup>b</sup> <sup>yx</sup> | 72.8 $\pm$ 1.1 <sup>b</sup> <sup>xw</sup> | 37.5 $\pm$ 7.4 <sup>a</sup> <sup>x</sup> | 76.5 $\pm$ 8.1 <sup>a</sup> <sup>w</sup>   | 48.6 $\pm$ 5.1 <sup>b</sup> <sup>w</sup>  | 46.7 $\pm$ 4.7 <sup>b</sup> <sup>x</sup>   |
|                                                        | 250 | 27.4 $\pm$ 2.7 <sup>a</sup> <sup>w</sup>  | 37.2 $\pm$ 4.0 <sup>a</sup> <sup>v</sup> | 67.1 $\pm$ 6.7 <sup>a</sup> <sup>x</sup>              | 65.9 $\pm$ 6.5 <sup>c</sup> <sup>xw</sup> | 55.1 $\pm$ 6.8 <sup>a</sup> <sup>w</sup>  | 49.5 $\pm$ 5.4 <sup>b</sup> <sup>xw</sup> | 69.9 $\pm$ 0.9 <sup>c</sup> <sup>w</sup>  | 58.2 $\pm$ 4.7 <sup>a</sup> <sup>w</sup> | 86.5 $\pm$ 9.6 <sup>a</sup> <sup>wv</sup>  | 43.5 $\pm$ 5.9 <sup>b</sup> <sup>wv</sup> | 35.9 $\pm$ 2.4 <sup>b</sup> <sup>w</sup>   |
|                                                        | 500 | 22.5 $\pm$ 1.9 <sup>a</sup> <sup>v</sup>  | 29.3 $\pm$ 2.6 <sup>a</sup> <sup>u</sup> | 40.4 $\pm$ 6.6 <sup>a</sup> <sup>w</sup>              | 47.3 $\pm$ 5.9 <sup>b</sup> <sup>w</sup>  | 44.9 $\pm$ 1.3 <sup>b</sup> <sup>v</sup>  | 46.6 $\pm$ 4.6 <sup>c</sup> <sup>w</sup>  | 66.8 $\pm$ 1.5 <sup>b</sup> <sup>w</sup>  | 75.5 $\pm$ 4.2 <sup>a</sup> <sup>v</sup> | 96.5 $\pm$ 10.0 <sup>a</sup> <sup>v</sup>  | 41.3 $\pm$ 4.7 <sup>b</sup> <sup>v</sup>  | 28.3 $\pm$ 2.9 <sup>b</sup> <sup>v</sup>   |
| <b>EC<sub>50</sub> (<math>\mu\text{g/mL}</math>)</b>   |     | 97.5 $\pm$ 6.5 <sup>b</sup>               | 135.2 $\pm$ 9.4 <sup>a</sup>             | 341.8 $\pm$ 42.8 <sup>a</sup>                         | 420.3 $\pm$ 25.0 <sup>a</sup>             | 321.8 $\pm$ 24.1 <sup>c</sup>             | 179.3 $\pm$ 36.8 <sup>b</sup>             | > 500                                     | 232.9 $\pm$ 16.5 <sup>a</sup>            | 32.6 $\pm$ 5.5 <sup>a</sup>                | 187.2 $\pm$ 25.7 <sup>b</sup>             | 148.0 $\pm$ 12.3 <sup>b</sup>              |
| <b>Cocoa shell (<math>\mu\text{g/mL}</math>)</b>       | 31  | 56.0 $\pm$ 7.2 <sup>a</sup> <sup>y</sup>  | 91.9 $\pm$ 3.3 <sup>b</sup> <sup>y</sup> | 68.4 $\pm$ 4.1 <sup>a</sup> <sup>y</sup>              | 70.7 $\pm$ 5.6 <sup>a</sup> <sup>y</sup>  | 87.8 $\pm$ 6.9 <sup>b</sup> <sup>y</sup>  | 62.5 $\pm$ 4.7 <sup>b</sup> <sup>y</sup>  | 77.6 $\pm$ 5.4 <sup>a</sup> <sup>y</sup>  | 1.0 $\pm$ 0.5 <sup>a</sup> <sup>z</sup>  | 97.0 $\pm$ 8.6 <sup>c</sup> <sup>y</sup>   | 39.4 $\pm$ 4.6 <sup>a</sup> <sup>y</sup>  | 41.6 $\pm$ 8.6 <sup>a</sup> <sup>y</sup>   |
|                                                        | 63  | 52.2 $\pm$ 6.2 <sup>a</sup> <sup>y</sup>  | 78.2 $\pm$ 2.9 <sup>b</sup> <sup>x</sup> | 66.0 $\pm$ 7.5 <sup>a</sup> <sup>yx</sup>             | 56.7 $\pm$ 6.1 <sup>a</sup> <sup>x</sup>  | 76.7 $\pm$ 4.8 <sup>b</sup> <sup>y</sup>  | 60.5 $\pm$ 2.7 <sup>b</sup> <sup>y</sup>  | 73.5 $\pm$ 2.6 <sup>a</sup> <sup>y</sup>  | 10.9 $\pm$ 1.3 <sup>a</sup> <sup>y</sup> | 106.8 $\pm$ 11.3 <sup>b</sup> <sup>y</sup> | 30.7 $\pm$ 4.5 <sup>a</sup> <sup>y</sup>  | 33.2 $\pm$ 8.8 <sup>a</sup> <sup>yx</sup>  |
|                                                        | 125 | 48.3 $\pm$ 4.5 <sup>a</sup> <sup>yx</sup> | 64.2 $\pm$ 3.0 <sup>b</sup> <sup>w</sup> | 61.6 $\pm$ 7.5 <sup>a</sup> <sup>yx</sup>             | 44.9 $\pm$ 4.3 <sup>a</sup> <sup>w</sup>  | 55.4 $\pm$ 3.4 <sup>b</sup> <sup>x</sup>  | 56.1 $\pm$ 3.3 <sup>b</sup> <sup>y</sup>  | 68.8 $\pm$ 2.0 <sup>a</sup> <sup>x</sup>  | 37.1 $\pm$ 4.6 <sup>a</sup> <sup>x</sup> | 113.8 $\pm$ 12.0 <sup>b</sup> <sup>y</sup> | 24.6 $\pm$ 2.0 <sup>a</sup> <sup>x</sup>  | 26.6 $\pm$ 6.7 <sup>a</sup> <sup>x</sup>   |
|                                                        | 250 | 38.7 $\pm$ 4.4 <sup>b</sup> <sup>xw</sup> | 50.5 $\pm$ 1.1 <sup>b</sup> <sup>v</sup> | 56.5 $\pm$ 9.7 <sup>a</sup> <sup>x</sup>              | 19.8 $\pm$ 9.2 <sup>a</sup> <sup>y</sup>  | 47.3 $\pm$ 6.0 <sup>a</sup> <sup>x</sup>  | 43.6 $\pm$ 2.8 <sup>b</sup> <sup>x</sup>  | 65.1 $\pm$ 0.2 <sup>b</sup> <sup>w</sup>  | 48.8 $\pm$ 5.0 <sup>a</sup> <sup>w</sup> | 119.7 $\pm$ 11.6 <sup>b</sup> <sup>x</sup> | 18.0 $\pm$ 2.1 <sup>a</sup> <sup>w</sup>  | 20.3 $\pm$ 8.3 <sup>a</sup> <sup>x</sup>   |
|                                                        | 500 | 30.1 $\pm$ 7.2 <sup>a</sup> <sup>w</sup>  | 43.5 $\pm$ 3.2 <sup>b</sup> <sup>u</sup> | 49.9 $\pm$ 5.5 <sup>a</sup> <sup>b</sup> <sup>x</sup> | 0.6 $\pm$ 6.2 <sup>a</sup> <sup>u</sup>   | 33.3 $\pm$ 3.7 <sup>a</sup> <sup>w</sup>  | 28.8 $\pm$ 2.8 <sup>a</sup> <sup>w</sup>  | 59.9 $\pm$ 1.1 <sup>a</sup> <sup>v</sup>  | 68.5 $\pm$ 4.3 <sup>a</sup> <sup>v</sup> | 134.3 $\pm$ 9.0 <sup>b</sup> <sup>w</sup>  | 0.1 $\pm$ 0.0 <sup>a</sup> <sup>v</sup>   | 0.3 $\pm$ 7.0 <sup>a</sup> <sup>w</sup>    |
| <b>EC<sub>50</sub> (<math>\mu\text{g/mL}</math>)</b>   |     | 94.0 $\pm$ 16.5 <sup>ab</sup>             | 276.4 $\pm$ 19.2 <sup>b</sup>            | 498.9 $\pm$ 50.3 <sup>b</sup>                         | 76.1 $\pm$ 8.6 <sup>a</sup>               | 204.9 $\pm$ 15.2 <sup>b</sup>             | 132.5 $\pm$ 18.8 <sup>b</sup>             | > 500                                     | 268.7 $\pm$ 25.1 <sup>b</sup>            | < 31                                       | 26.7 $\pm$ 2.8 <sup>a</sup>               | 30.2 $\pm$ 4.4 <sup>a</sup>                |

N.D.: not determined

**Table S2.** Protective effect of coffee husk, coffee silverskin, and cocoa shell extracts against oxidative stress and mitochondrial dysfunction regulating ROS and  $\Delta\Psi_m$  in RAW264.7 macrophages and ROS, mitochondrial  $O_2^{\cdot -}$ ,  $\Delta\Psi_m$ , mitochondrial content, citrate synthase activity, OCR, and ATP content in 3T3-L1 adipocytes. Values are expressed as mean  $\pm$  SD ( $n = 3$ ). Different letters among rows (same concentration) indicate significant differences ( $p < 0.05$ ) according to ANOVA and Tukey's multiple range test.

| RAW264.7 macrophages                             |                              |                                          |                                          |                                                 | 3T3-L1 adipocytes                        |                                          |                                          |                                         |                                          |                                             |                                            |                                          |
|--------------------------------------------------|------------------------------|------------------------------------------|------------------------------------------|-------------------------------------------------|------------------------------------------|------------------------------------------|------------------------------------------|-----------------------------------------|------------------------------------------|---------------------------------------------|--------------------------------------------|------------------------------------------|
|                                                  | ROS (LPS)                    | $\Delta\Psi_m$ (LPS)                     | ROS (H <sub>2</sub> O <sub>2</sub> )     | $\Delta\Psi_m$ (H <sub>2</sub> O <sub>2</sub> ) | ROS                                      | Mit. O <sub>2</sub> <sup>·-</sup>        | $\Delta\Psi_m$                           | Mit. content                            | CS activity                              | OCR                                         | ATP content                                |                                          |
| <b>NT</b>                                        | 100.0 $\pm$ 6.3 <sup>z</sup> | 0.0 $\pm$ 5.7 <sup>z</sup>               | 100.0 $\pm$ 9.7 <sup>z</sup>             | 0.0 $\pm$ 2.2 <sup>z</sup>                      | 100.0 $\pm$ 4.0 <sup>z</sup>             | 100.0 $\pm$ 5.8 <sup>z</sup>             | 0.0 $\pm$ 2.4 <sup>z</sup>               | 0.0 $\pm$ 5.7 <sup>z</sup>              | 0.0 $\pm$ 2.7 <sup>z</sup>               | 0.0 $\pm$ 5.9 <sup>z</sup>                  | 0.0 $\pm$ 3.4 <sup>z</sup>                 |                                          |
| <b>Coffee husk</b><br>( $\mu\text{g/mL}$ )       | 31                           | 64.0 $\pm$ 5.7 <sup>b<sup>y</sup></sup>  | 3.8 $\pm$ 1.7 <sup>a<sup>z</sup></sup>   | 69.2 $\pm$ 6.1 <sup>b<sup>y</sup></sup>         | 41.2 $\pm$ 7.4 <sup>y</sup>              | 73.8 $\pm$ 5.6 <sup>a<sup>y</sup></sup>  | 81.9 $\pm$ 9.8 <sup>a<sup>y</sup></sup>  | 11.0 $\pm$ 3.0 <sup>a<sup>y</sup></sup> | 14.0 $\pm$ 1.8 <sup>a<sup>y</sup></sup>  | 75.6 $\pm$ 11.3 <sup>a<sup>y</sup></sup>    | 1.1 $\pm$ 5.1 <sup>ab<sup>z</sup></sup>    | 11.4 $\pm$ 0.1 <sup>a<sup>y</sup></sup>  |
|                                                  | 63                           | 45.8 $\pm$ 4.9 <sup>b<sup>x</sup></sup>  | 6.6 $\pm$ 2.8 <sup>a<sup>zy</sup></sup>  | 58.3 $\pm$ 3.1 <sup>b<sup>x</sup></sup>         | 69.0 $\pm$ 8.0 <sup>c<sup>x</sup></sup>  | 60.1 $\pm$ 5.8 <sup>a<sup>x</sup></sup>  | 63.8 $\pm$ 5.6 <sup>a<sup>x</sup></sup>  | 22.4 $\pm$ 3.6 <sup>a<sup>x</sup></sup> | 44.7 $\pm$ 3.9 <sup>a<sup>x</sup></sup>  | 104.7 $\pm$ 8.2 <sup>a<sup>x</sup></sup>    | 14.2 $\pm$ 4.4 <sup>ab<sup>y</sup></sup>   | 35.3 $\pm$ 1.7 <sup>a<sup>x</sup></sup>  |
|                                                  | 125                          | 27.4 $\pm$ 2.9 <sup>a<sup>w</sup></sup>  | 9.1 $\pm$ 2.8 <sup>a<sup>y</sup></sup>   | 49.3 $\pm$ 3.6 <sup>w</sup>                     | 81.6 $\pm$ 1.4 <sup>b<sup>w</sup></sup>  | 47.3 $\pm$ 7.1 <sup>a<sup>xw</sup></sup> | 53.0 $\pm$ 9.3 <sup>a<sup>xw</sup></sup> | 27.1 $\pm$ 3.8 <sup>a<sup>x</sup></sup> | 55.5 $\pm$ 5.2 <sup>a<sup>w</sup></sup>  | 114.6 $\pm$ 0.7 <sup>a<sup>xw</sup></sup>   | 18.8 $\pm$ 9.7 <sup>a<sup>yx</sup></sup>   | 43.3 $\pm$ 1.8 <sup>w</sup>              |
|                                                  | 250                          | 7.8 $\pm$ 0.2 <sup>a<sup>v</sup></sup>   | 12.6 $\pm$ 1.6 <sup>a<sup>x</sup></sup>  | 41.7 $\pm$ 2.9 <sup>c<sup>v</sup></sup>         | 92.6 $\pm$ 8.7 <sup>b<sup>v</sup></sup>  | 39.5 $\pm$ 5.6 <sup>a<sup>wv</sup></sup> | 48.9 $\pm$ 9.3 <sup>a<sup>xw</sup></sup> | 41.0 $\pm$ 4.5 <sup>a<sup>w</sup></sup> | 71.4 $\pm$ 7.4 <sup>a<sup>v</sup></sup>  | 114.9 $\pm$ 8.4 <sup>a<sup>w</sup></sup>    | 21.0 $\pm$ 11.9 <sup>a<sup>yx</sup></sup>  | 51.2 $\pm$ 3.8 <sup>a<sup>v</sup></sup>  |
|                                                  | 500                          | 0.6 $\pm$ 0.3 <sup>a<sup>u</sup></sup>   | 20.3 $\pm$ 1.8 <sup>a<sup>w</sup></sup>  | 27.8 $\pm$ 3.3 <sup>b<sup>u</sup></sup>         | 94.3 $\pm$ 8.1 <sup>b<sup>v</sup></sup>  | 33.6 $\pm$ 4.0 <sup>a<sup>v</sup></sup>  | 47.4 $\pm$ 7.7 <sup>a<sup>w</sup></sup>  | 58.5 $\pm$ 5.4 <sup>a<sup>v</sup></sup> | 96.1 $\pm$ 9.0 <sup>a<sup>u</sup></sup>  | 146.9 $\pm$ 23.2 <sup>a<sup>v</sup></sup>   | 30.1 $\pm$ 13.6 <sup>a<sup>x</sup></sup>   | 67.8 $\pm$ 6.2 <sup>a<sup>u</sup></sup>  |
| <b>EC<sub>50</sub></b><br>( $\mu\text{g/mL}$ )   | 48.2 $\pm$ 2.4 <sup>b</sup>  | > 500                                    | 120.7 $\pm$ 13.5 <sup>c</sup>            | 33.6 $\pm$ 3.7 <sup>a</sup>                     | 128.1 $\pm$ 15.2 <sup>a</sup>            | 201.6 $\pm$ 35.0 <sup>a</sup>            | 336.0 $\pm$ 12.5 <sup>b</sup>            | 96.0 $\pm$ 8.6 <sup>b</sup>             | < 31                                     | 931.1 $\pm$ 171.3 <sup>c</sup>              | 188.2 $\pm$ 16.5 <sup>c</sup>              |                                          |
| <b>Coffee silverskin</b><br>( $\mu\text{g/mL}$ ) | 31                           | 57.8 $\pm$ 5.4 <sup>ab<sup>y</sup></sup> | 13.9 $\pm$ 3.2 <sup>b<sup>y</sup></sup>  | 65.5 $\pm$ 2.3 <sup>b<sup>y</sup></sup>         | 31.7 $\pm$ 5.7 <sup>b<sup>y</sup></sup>  | 78.5 $\pm$ 6.0 <sup>a<sup>y</sup></sup>  | 81.4 $\pm$ 5.1 <sup>a<sup>y</sup></sup>  | 13.9 $\pm$ 3.1 <sup>a<sup>y</sup></sup> | 31.7 $\pm$ 3.7 <sup>b<sup>y</sup></sup>  | 94.6 $\pm$ 10.3 <sup>b<sup>y</sup></sup>    | 11.4 $\pm$ 6.3 <sup>b<sup>zy</sup></sup>   | 27.8 $\pm$ 4.8 <sup>y</sup>              |
|                                                  | 63                           | 53.2 $\pm$ 5.6 <sup>b<sup>y</sup></sup>  | 20.5 $\pm$ 2.4 <sup>b<sup>x</sup></sup>  | 53.4 $\pm$ 4.8 <sup>b<sup>x</sup></sup>         | 46.5 $\pm$ 9.1 <sup>b<sup>y</sup></sup>  | 73.9 $\pm$ 1.6 <sup>b<sup>y</sup></sup>  | 78.5 $\pm$ 2.0 <sup>b<sup>yx</sup></sup> | 37.1 $\pm$ 4.3 <sup>b<sup>x</sup></sup> | 70.7 $\pm$ 5.6 <sup>b<sup>x</sup></sup>  | 100.5 $\pm$ 8.7 <sup>a<sup>y</sup></sup>    | 23.3 $\pm$ 8.0 <sup>b<sup>yx</sup></sup>   | 52.8 $\pm$ 0.6 <sup>b<sup>x</sup></sup>  |
|                                                  | 125                          | 39.7 $\pm$ 4.1 <sup>b<sup>x</sup></sup>  | 27.3 $\pm$ 3.1 <sup>b<sup>w</sup></sup>  | 38.0 $\pm$ 2.5 <sup>b<sup>w</sup></sup>         | 61.9 $\pm$ 3.1 <sup>a<sup>x</sup></sup>  | 67.1 $\pm$ 8.9 <sup>b<sup>yx</sup></sup> | 71.4 $\pm$ 6.2 <sup>b<sup>xw</sup></sup> | 49.1 $\pm$ 4.9 <sup>b<sup>x</sup></sup> | 90.2 $\pm$ 4.7 <sup>c<sup>w</sup></sup>  | 109.2 $\pm$ 15.1 <sup>a<sup>yx</sup></sup>  | 31.3 $\pm$ 6.8 <sup>a<sup>x</sup></sup>    | 66.5 $\pm$ 1.8 <sup>c<sup>w</sup></sup>  |
|                                                  | 250                          | 26.1 $\pm$ 2.5 <sup>b<sup>w</sup></sup>  | 35.9 $\pm$ 4.7 <sup>b<sup>v</sup></sup>  | 24.3 $\pm$ 2.6 <sup>b<sup>v</sup></sup>         | 76.5 $\pm$ 10.6 <sup>a<sup>w</sup></sup> | 59.9 $\pm$ 6.1 <sup>b<sup>x</sup></sup>  | 65.3 $\pm$ 8.2 <sup>b<sup>w</sup></sup>  | 63.3 $\pm$ 5.6 <sup>b<sup>w</sup></sup> | 107.9 $\pm$ 2.4 <sup>b<sup>v</sup></sup> | 125.8 $\pm$ 1.3 <sup>b<sup>x</sup></sup>    | 38.1 $\pm$ 10.2 <sup>ab<sup>x</sup></sup>  | 78.3 $\pm$ 3.9 <sup>b<sup>v</sup></sup>  |
|                                                  | 500                          | 17.9 $\pm$ 2.1 <sup>b<sup>v</sup></sup>  | 51.8 $\pm$ 4.4 <sup>b<sup>u</sup></sup>  | 13.8 $\pm$ 2.2 <sup>a<sup>u</sup></sup>         | 80.9 $\pm$ 4.5 <sup>a<sup>w</sup></sup>  | 54.9 $\pm$ 5.5 <sup>c<sup>x</sup></sup>  | 62.0 $\pm$ 6.4 <sup>b<sup>w</sup></sup>  | 76.6 $\pm$ 5.4 <sup>b<sup>v</sup></sup> | 140.8 $\pm$ 2.9 <sup>b<sup>u</sup></sup> | 150.8 $\pm$ 11.2 <sup>a<sup>w</sup></sup>   | 66.5 $\pm$ 10.8 <sup>b<sup>w</sup></sup>   | 108.3 $\pm$ 3.6 <sup>b<sup>u</sup></sup> |
| <b>EC<sub>50</sub></b><br>( $\mu\text{g/mL}$ )   | 69.5 $\pm$ 6.6 <sup>c</sup>  | 391.3 $\pm$ 33.0 <sup>a</sup>            | 71.7 $\pm$ 3.2 <sup>b</sup>              | 75.6 $\pm$ 6.6 <sup>b</sup>                     | 350.6 $\pm$ 56.9 <sup>b</sup>            | > 500                                    | 135.3 $\pm$ 9.2 <sup>a</sup>             | 43.2 $\pm$ 6.8 <sup>a</sup>             | < 31                                     | 291.8 $\pm$ 34.0 <sup>a</sup>               | 59.4 $\pm$ 7.6 <sup>a</sup>                |                                          |
| <b>Cocoa shell</b><br>( $\mu\text{g/mL}$ )       | 31                           | 50.7 $\pm$ 5.1 <sup>a<sup>y</sup></sup>  | 23.8 $\pm$ 3.2 <sup>c<sup>y</sup></sup>  | 55.0 $\pm$ 6.2 <sup>a<sup>y</sup></sup>         | 12.7 $\pm$ 9.1 <sup>a<sup>y</sup></sup>  | 75.0 $\pm$ 3.9 <sup>a<sup>y</sup></sup>  | 72.4 $\pm$ 8.5 <sup>a<sup>y</sup></sup>  | 14.6 $\pm$ 3.2 <sup>a<sup>y</sup></sup> | 12.1 $\pm$ 5.5 <sup>a<sup>y</sup></sup>  | 95.0 $\pm$ 8.0 <sup>b<sup>zy</sup></sup>    | 0.6 $\pm$ 1.8 <sup>a<sup>z</sup></sup>     | 19.8 $\pm$ 5.9 <sup>b<sup>y</sup></sup>  |
|                                                  | 63                           | 38.0 $\pm$ 3.5 <sup>a<sup>x</sup></sup>  | 25.8 $\pm$ 2.1 <sup>c<sup>y</sup></sup>  | 44.6 $\pm$ 3.2 <sup>a<sup>x</sup></sup>         | 30.2 $\pm$ 2.4 <sup>a<sup>x</sup></sup>  | 68.4 $\pm$ 4.8 <sup>ab<sup>y</sup></sup> | 63.2 $\pm$ 6.1 <sup>a<sup>yx</sup></sup> | 22.3 $\pm$ 3.6 <sup>a<sup>x</sup></sup> | 36.8 $\pm$ 5.5 <sup>a<sup>x</sup></sup>  | 109.1 $\pm$ 8.4 <sup>a<sup>yw</sup></sup>   | 11.8 $\pm$ 5.3 <sup>a<sup>zy</sup></sup>   | 31.6 $\pm$ 4.3 <sup>a<sup>x</sup></sup>  |
|                                                  | 125                          | 26.0 $\pm$ 3.0 <sup>a<sup>w</sup></sup>  | 33.7 $\pm$ 3.9 <sup>c<sup>x</sup></sup>  | 31.5 $\pm$ 4.1 <sup>a<sup>w</sup></sup>         | 63.6 $\pm$ 9.2 <sup>a<sup>w</sup></sup>  | 58.0 $\pm$ 4.2 <sup>ab<sup>x</sup></sup> | 59.8 $\pm$ 1.3 <sup>a<sup>x</sup></sup>  | 38.9 $\pm$ 4.4 <sup>b<sup>w</sup></sup> | 76.5 $\pm$ 6.6 <sup>b<sup>w</sup></sup>  | 116.5 $\pm$ 10.5 <sup>a<sup>w</sup></sup>   | 25.3 $\pm$ 10.3 <sup>ab<sup>yx</sup></sup> | 55.7 $\pm$ 3.0 <sup>b<sup>w</sup></sup>  |
|                                                  | 250                          | 8.1 $\pm$ 6.2 <sup>a<sup>v</sup></sup>   | 40.8 $\pm$ 4.8 <sup>b<sup>xw</sup></sup> | 19.9 $\pm$ 2.0 <sup>a<sup>y</sup></sup>         | 79.3 $\pm$ 1.2 <sup>a<sup>w</sup></sup>  | 45.7 $\pm$ 4.1 <sup>a<sup>w</sup></sup>  | 51.8 $\pm$ 6.6 <sup>a<sup>w</sup></sup>  | 55.0 $\pm$ 5.2 <sup>b<sup>v</sup></sup> | 109.2 $\pm$ 7.3 <sup>b<sup>v</sup></sup> | 124.4 $\pm$ 10.4 <sup>ab<sup>wv</sup></sup> | 39.7 $\pm$ 5.9 <sup>b<sup>x</sup></sup>    | 77.7 $\pm$ 8.0 <sup>b<sup>v</sup></sup>  |
|                                                  | 500                          | 0.5 $\pm$ 1.6 <sup>a<sup>u</sup></sup>   | 46.0 $\pm$ 5.3 <sup>b<sup>w</sup></sup>  | 13.1 $\pm$ 3.1 <sup>a<sup>u</sup></sup>         | 89.9 $\pm$ 1.5 <sup>b<sup>v</sup></sup>  | 41.3 $\pm$ 4.1 <sup>b<sup>w</sup></sup>  | 49.2 $\pm$ 4.5 <sup>a<sup>w</sup></sup>  | 96.6 $\pm$ 4.5 <sup>c<sup>u</sup></sup> | 144.8 $\pm$ 7.2 <sup>b<sup>u</sup></sup> | 135.4 $\pm$ 3.1 <sup>a<sup>v</sup></sup>    | 61.8 $\pm$ 7.6 <sup>b<sup>w</sup></sup>    | 105.7 $\pm$ 8.0 <sup>b<sup>u</sup></sup> |
| <b>EC<sub>50</sub></b><br>( $\mu\text{g/mL}$ )   | 34.7 $\pm$ 2.7 <sup>a</sup>  | 334.9 $\pm$ 52.8 <sup>a</sup>            | 46.6 $\pm$ 3.5 <sup>a</sup>              | 97.8 $\pm$ 12.4 <sup>c</sup>                    | 192.3 $\pm$ 23.4 <sup>a</sup>            | 221.2 $\pm$ 40.4 <sup>a</sup>            | 161.5 $\pm$ 22.9 <sup>a</sup>            | 74.9 $\pm$ 12.1 <sup>b</sup>            | < 31                                     | 368.8 $\pm$ 35.9 <sup>b</sup>               | 91.9 $\pm$ 14.3 <sup>b</sup>               |                                          |

N.D.: not determined

**Table S3.** Anti-adipogenic effect of coffee husk, coffee silverskin, and cocoa shell extracts modulating lipid accumulation, intracellular triglyceride content, extracellular glycerol release, lipase activity, mitochondrial content, citrate synthase activity, and ATP content in 3T3-L1 adipocytes. Values are expressed as mean  $\pm$  SD ( $n = 3$ ). Different letters among rows indicate significant differences ( $p < 0.05$ ) according to ANOVA and Tukey's multiple range test.

|                                                        |     | <b>Lipid accumulation</b>                           | <b>Triglyceride content</b>                         | <b>Glycerol release</b>                              | <b>Lipase activity</b>                               | <b>Mitochondrial content</b>                        | <b>CS activity</b>                      | <b>ATP content</b>                      |
|--------------------------------------------------------|-----|-----------------------------------------------------|-----------------------------------------------------|------------------------------------------------------|------------------------------------------------------|-----------------------------------------------------|-----------------------------------------|-----------------------------------------|
| <b>NT</b>                                              |     | 100.0 $\pm$ 3.6 <sup>z</sup>                        | 100.0 $\pm$ 4.2 <sup>z</sup>                        | 0.0 $\pm$ 7.6 <sup>z</sup>                           | 0.0 $\pm$ 2.2 <sup>z</sup>                           | 0.0 $\pm$ 4.4 <sup>z</sup>                          | 0.0 $\pm$ 3.9 <sup>z</sup>              | 0.0 $\pm$ 3.7 <sup>z</sup>              |
| <b>Coffee husk (<math>\mu\text{g/mL}</math>)</b>       | 31  | 95.9 $\pm$ 3.8 <sup>b<sup>y</sup></sup>             | 63.1 $\pm$ 1.8 <sup>b<sup>y</sup></sup>             | 71.1 $\pm$ 3.5 <sup>b<sup>y</sup></sup>              | 7.6 $\pm$ 1.6 <sup>a<sup>y</sup></sup>               | 1.0 $\pm$ 2.8 <sup>a<sup>z</sup></sup>              | 9.0 $\pm$ 3.5 <sup>a<sup>y</sup></sup>  | 2.9 $\pm$ 1.9 <sup>a<sup>z</sup></sup>  |
|                                                        | 63  | 81.1 $\pm$ 3.4 <sup>a<sup>x</sup></sup>             | 55.9 $\pm$ 3.1 <sup>a<sup>w</sup></sup>             | 99.6 $\pm$ 2.5 <sup>b<sup>x</sup></sup>              | 15.1 $\pm$ 5.8 <sup>a<sup>x</sup></sup>              | 5.9 $\pm$ 1.9 <sup>a<sup>z</sup></sup>              | 20.3 $\pm$ 4.1 <sup>a<sup>x</sup></sup> | 8.7 $\pm$ 1.7 <sup>a<sup>y</sup></sup>  |
|                                                        | 125 | 66.7 $\pm$ 4.2 <sup>a<sup>w</sup></sup>             | 53.2 $\pm$ 3.9 <sup>a<sup>w<sup>v</sup></sup></sup> | 111.1 $\pm$ 0.8 <sup>b<sup>w</sup></sup>             | 18.4 $\pm$ 6.6 <sup>a<sup>x</sup></sup>              | 8.4 $\pm$ 1.5 <sup>a<sup>y</sup></sup>              | 24.9 $\pm$ 4.4 <sup>a<sup>x</sup></sup> | 11.9 $\pm$ 2.6 <sup>a<sup>y</sup></sup> |
|                                                        | 250 | 56.1 $\pm$ 7.2 <sup>a<sup>v</sup></sup>             | 48.9 $\pm$ 0.3 <sup>b<sup>v</sup></sup>             | 129.9 $\pm$ 2.1 <sup>b<sup>v</sup></sup>             | 23.5 $\pm$ 8.8 <sup>a<sup>x<sup>w</sup></sup></sup>  | 12.1 $\pm$ 4.0 <sup>a<sup>y<sup>x</sup></sup></sup> | 31.5 $\pm$ 3.7 <sup>a<sup>w</sup></sup> | 17.6 $\pm$ 3.0 <sup>a<sup>x</sup></sup> |
|                                                        | 500 | 40.9 $\pm$ 6.8 <sup>a<sup>u</sup></sup>             | 44.2 $\pm$ 0.4 <sup>b<sup>u</sup></sup>             | 162.6 $\pm$ 19.0 <sup>b<sup>u</sup></sup>            | 31.7 $\pm$ 4.7 <sup>a<sup>w</sup></sup>              | 17.6 $\pm$ 2.9 <sup>a<sup>x</sup></sup>             | 40.9 $\pm$ 4.2 <sup>a<sup>v</sup></sup> | 27.5 $\pm$ 3.4 <sup>a<sup>x</sup></sup> |
| <b>EC<sub>50</sub> (<math>\mu\text{g/mL}</math>)</b>   |     | 309.6 $\pm$ 23.8 <sup>a</sup>                       | 151.5 $\pm$ 30.5 <sup>b</sup>                       | 4.1 $\pm$ 1.7 <sup>a</sup>                           | 833.6 $\pm$ 106.7 <sup>b</sup>                       | > 500                                               | 531.1 $\pm$ 62.4 <sup>b</sup>           | 1193.0 $\pm$ 98.7 <sup>c</sup>          |
| <b>Coffee silverskin (<math>\mu\text{g/mL}</math>)</b> | 31  | 89.6 $\pm$ 3.2 <sup>a<sup>y</sup></sup>             | 56.9 $\pm$ 3.6 <sup>a<sup>y</sup></sup>             | 192.5 $\pm$ 12.3 <sup>c<sup>y</sup></sup>            | 13.5 $\pm$ 5.8 <sup>a<sup>y</sup></sup>              | 4.8 $\pm$ 2.4 <sup>a<sup>z</sup></sup>              | 18.1 $\pm$ 2.6 <sup>b<sup>y</sup></sup> | 7.3 $\pm$ 2.4 <sup>b<sup>y</sup></sup>  |
|                                                        | 63  | 84.7 $\pm$ 1.8 <sup>a<sup>x</sup></sup>             | 55.4 $\pm$ 2.5 <sup>a<sup>y</sup></sup>             | 204.2 $\pm$ 2.9 <sup>c<sup>y</sup></sup>             | 16.3 $\pm$ 6.0 <sup>a<sup>y</sup></sup>              | 6.7 $\pm$ 2.7 <sup>a<sup>z</sup></sup>              | 22.0 $\pm$ 3.2 <sup>a<sup>y</sup></sup> | 9.8 $\pm$ 1.3 <sup>a<sup>y</sup></sup>  |
|                                                        | 125 | 75.1 $\pm$ 5.0 <sup>a<sup>b<sup>w</sup></sup></sup> | 49.8 $\pm$ 6.2 <sup>a<sup>y<sup>x</sup></sup></sup> | 225.8 $\pm$ 1.6 <sup>c<sup>x</sup></sup>             | 22.3 $\pm$ 8.2 <sup>a<sup>y</sup></sup>              | 11.2 $\pm$ 3.7 <sup>b<sup>y</sup></sup>             | 30.0 $\pm$ 3.6 <sup>a<sup>x</sup></sup> | 16.2 $\pm$ 2.0 <sup>b<sup>x</sup></sup> |
|                                                        | 250 | 68.9 $\pm$ 4.5 <sup>b<sup>w</sup></sup>             | 44.3 $\pm$ 2.4 <sup>a<sup>x</sup></sup>             | 261.3 $\pm$ 1.4 <sup>c<sup>w</sup></sup>             | 31.5 $\pm$ 14.4 <sup>a<sup>y<sup>w</sup></sup></sup> | 17.5 $\pm$ 3.9 <sup>b<sup>y</sup></sup>             | 40.7 $\pm$ 4.2 <sup>b<sup>w</sup></sup> | 27.3 $\pm$ 3.9 <sup>b<sup>w</sup></sup> |
|                                                        | 500 | 55.5 $\pm$ 6.7 <sup>b<sup>v</sup></sup>             | 37.0 $\pm$ 1.8 <sup>a<sup>w</sup></sup>             | 320.0 $\pm$ 11.3 <sup>c<sup>y</sup></sup>            | 45.6 $\pm$ 5.4 <sup>b<sup>w</sup></sup>              | 26.6 $\pm$ 4.5 <sup>b<sup>x</sup></sup>             | 54.5 $\pm$ 6.1 <sup>b<sup>v</sup></sup> | 48.0 $\pm$ 5.2 <sup>c<sup>v</sup></sup> |
| <b>EC<sub>50</sub> (<math>\mu\text{g/mL}</math>)</b>   |     | 515.3 $\pm$ 46.1 <sup>b</sup>                       | 115.7 $\pm$ 22.3 <sup>a</sup>                       | < 31                                                 | 492.1 $\pm$ 48.6 <sup>a</sup>                        | > 500                                               | 328.9 $\pm$ 33.2 <sup>a</sup>           | 587.5 $\pm$ 35.2 <sup>a</sup>           |
| <b>Cocoa shell (<math>\mu\text{g/mL}</math>)</b>       | 31  | 94.7 $\pm$ 2.2 <sup>b<sup>y</sup></sup>             | 88.1 $\pm$ 4.5 <sup>c<sup>y</sup></sup>             | 43.6 $\pm$ 6.1 <sup>a<sup>y</sup></sup>              | 6.5 $\pm$ 3.5 <sup>a<sup>y</sup></sup>               | 3.9 $\pm$ 1.9 <sup>a<sup>z</sup></sup>              | 5.9 $\pm$ 2.0 <sup>a<sup>z</sup></sup>  | 4.2 $\pm$ 1.7 <sup>a<sup>z</sup></sup>  |
|                                                        | 63  | 90.2 $\pm$ 2.3 <sup>b<sup>x</sup></sup>             | 82.9 $\pm$ 2.5 <sup>b<sup>y<sup>x</sup></sup></sup> | 48.0 $\pm$ 9.2 <sup>a<sup>y<sup>x</sup></sup></sup>  | 15.4 $\pm$ 3.4 <sup>a<sup>x</sup></sup>              | 12.4 $\pm$ 2.6 <sup>b<sup>y</sup></sup>             | 16.6 $\pm$ 3.5 <sup>a<sup>y</sup></sup> | 9.5 $\pm$ 2.5 <sup>a<sup>y</sup></sup>  |
|                                                        | 125 | 84.7 $\pm$ 6.4 <sup>b<sup>x<sup>w</sup></sup></sup> | 81.3 $\pm$ 2.2 <sup>b<sup>x</sup></sup>             | 53.9 $\pm$ 8.4 <sup>a<sup>y<sup>x</sup></sup></sup>  | 18.4 $\pm$ 4.4 <sup>a<sup>x<sup>w</sup></sup></sup>  | 16.5 $\pm$ 4.3 <sup>b<sup>y<sup>x</sup></sup></sup> | 25.6 $\pm$ 3.7 <sup>a<sup>x</sup></sup> | 20.0 $\pm$ 3.1 <sup>c<sup>x</sup></sup> |
|                                                        | 250 | 77.8 $\pm$ 5.6 <sup>c<sup>w<sup>v</sup></sup></sup> | 75.1 $\pm$ 5.1 <sup>c<sup>x<sup>w</sup></sup></sup> | 62.6 $\pm$ 10.7 <sup>a<sup>x<sup>w</sup></sup></sup> | 22.1 $\pm$ 4.7 <sup>a<sup>x<sup>w</sup></sup></sup>  | 19.3 $\pm$ 3.9 <sup>b<sup>x</sup></sup>             | 32.4 $\pm$ 4.8 <sup>a<sup>w</sup></sup> | 28.2 $\pm$ 3.4 <sup>b<sup>w</sup></sup> |
|                                                        | 500 | 67.5 $\pm$ 7.8 <sup>c<sup>y</sup></sup>             | 72.3 $\pm$ 4.6 <sup>c<sup>w</sup></sup>             | 75.9 $\pm$ 5.5 <sup>a<sup>w</sup></sup>              | 26.3 $\pm$ 4.3 <sup>a<sup>w</sup></sup>              | 23.3 $\pm$ 3.2 <sup>b<sup>x</sup></sup>             | 37.3 $\pm$ 4.0 <sup>a<sup>v</sup></sup> | 35.1 $\pm$ 4.0 <sup>b<sup>v</sup></sup> |
| <b>EC<sub>50</sub> (<math>\mu\text{g/mL}</math>)</b>   |     | 905.5 $\pm$ 88.4 <sup>c</sup>                       | 823.8 $\pm$ 146.7 <sup>c</sup>                      | 85.9 $\pm$ 4.3 <sup>b</sup>                          | 985.2 $\pm$ 142.9 <sup>b</sup>                       | > 500                                               | 577.2 $\pm$ 74.3 <sup>b</sup>           | 728.9 $\pm$ 65.1 <sup>b</sup>           |

N.D.: not determined

**Table S4.** Significantly ( $p < 0.05$ ) up- and down-phosphorylated proteins, expressed as  $\log_2$  (Fold Change), in insulin-resistant 3T3-L1 cells in response to treatment with extracts from coffee husk, coffee silverskin, and cocoa shell.

| Protein                           | Phosphosite | Effect of phosphorylation               | $\log_2$ (Fold Change) |                   |             |
|-----------------------------------|-------------|-----------------------------------------|------------------------|-------------------|-------------|
|                                   |             |                                         | Coffee husk            | Coffee silverskin | Cocoa shell |
| <i>Insulin receptor signaling</i> |             |                                         |                        |                   |             |
| Caveolin-1                        | Y14         | Induces activity                        | 1.06                   | 0.90              | 1.12        |
| INSR                              | Y1361       | Induces activity                        | 2.08                   | 0.65              | 2.07        |
|                                   | Y1355       | Induces activity                        | 0.53                   | 1.26              | 3.14        |
| IRS-1                             | S307        | Inhibits molecular association          | -0.92                  | -1.52             | -0.52       |
|                                   | S312        | Inhibits molecular association          | -0.47                  | -                 | -1.15       |
|                                   | S323        | Inhibits activity                       | -0.51                  | -                 | -0.58       |
|                                   | S612        | Inhibits activity                       | -                      | -                 | -0.90       |
|                                   | S639        | Inhibits molecular association          | -2.22                  | -2.23             | -1.11       |
|                                   | S794        | Inhibits molecular association          | -0.76                  | -1.27             | -0.40       |
|                                   | S1101       | Inhibits activity                       | -                      | -0.49             | -0.77       |
| GAB1                              | T627        | Induces molecular association           | -1.51                  | -1.06             | -1.23       |
|                                   | T659        | Induces molecular association           | -                      | 0.48              | 1.88        |
| GAB2                              | S159        | Induces molecular association           | 0.57                   | -                 | -           |
| SHC                               | Y349        | Induces activity                        | 0.83                   | -                 | 0.98        |
|                                   | Y427        | Induces activity                        | 0.51                   | 0.62              | -           |
| SHP-2                             | T542        | Induces molecular association           | -1.64                  | -0.37             | -0.40       |
|                                   | Y580        | Induces molecular association           | -                      | -0.44             | -           |
| <i>PI3K-AKT-PKB signaling</i>     |             |                                         |                        |                   |             |
| 4E-BP1                            | T45         | Inhibits molecular association          | -1.15                  | -0.74             | 0.44        |
|                                   | S65         | Inhibits molecular association          | -0.89                  | 0.32              | -           |
|                                   | T70         | Inhibits activity/molecular association | -                      | -1.84             | 0.48        |
| ACLY                              | S454        | Induces activity                        | -0.44                  | -                 | -           |
| AKT                               | T308        | Induces activity                        | 1.24                   | 0.33              | 2.06        |
|                                   | Y326        | Induces activity                        | 0.35                   | -                 | 0.53        |
|                                   | S473        | Induces activity                        | 0.36                   | -0.59             | 0.47        |
| AKT1                              | S124        | Induces activity                        | 1.39                   | 1.40              | 0.37        |
|                                   | S246        | Induces activity                        | -                      | 1.02              | 1.59        |
|                                   | Y474        | Induces activity                        | 0.47                   | 0.68              | 1.90        |
|                                   | T72         | Induces activity                        | 1.37                   | 0.54              | 1.70        |
| AKT2                              | S474        | Induces activity                        | -                      | 0.86              | 0.62        |
| BAD                               | S112        | Inhibits molecular association          | 0.79                   | -                 | -           |
|                                   | S134        | Inhibits molecular association          | 0.46                   | -                 | 0.92        |
|                                   | S136        | Inhibits molecular association          | 1.00                   | 0.46              | 1.05        |
|                                   | S155        | Inhibits molecular association          | 0.40                   | 0.73              | 0.52        |



|                       |              |                                 |       |       |       |
|-----------------------|--------------|---------------------------------|-------|-------|-------|
|                       | S91/18       | Inhibits molecular association  | 1.46  | –     | 1.43  |
| EIF2A                 | S51          | Inhibits activity               | –     | –0.64 | –     |
| EIF4E                 | S209         | Inhibits molecular interaction  | –0.43 | –1.52 | –     |
| EIF4G                 | S1108        | Inhibits activity               | –0.65 | –0.32 | 2.08  |
| FKHR                  | S256         | Inhibits molecular association  | 0.36  | 1.44  | –     |
|                       | S319         | Inhibits molecular association  | 0.53  | 0.75  | 0.87  |
| FKHRL1                | S253         | Inhibits activity               | 0.75  | 0.58  | –     |
| FOXO1/3/4-PAN         | T24/32       | Inhibits activity               | –     | –     | 0.52  |
| FOXO1A                | S329         | Inhibits activity               | 0.59  | –     | 0.71  |
| GSK3 $\alpha$         | S21          | Inhibits activity               | –     | –0.51 | 0.36  |
| GSK3 $\alpha/\beta$   | T216/279     | Induces activity                | –     | –1.33 | –     |
| GSK3 $\beta$          | S9           | Inhibits activity               | –0.65 | –0.89 | –     |
| HSL                   | S552         | Induces activity                | –1.09 | –     | –     |
|                       | S563         | Induces activity                | –1.09 | –     | –     |
|                       | S554         | Inhibits activity               | –     | 1.12  | 1.86  |
| mTOR                  | T2446        | Induces activity                | –     | –     | –0.59 |
|                       | S2448        | Induces activity                | –0.75 | –     | –     |
| p70S6K                | T229         | Induces activity                | –0.33 | –     | –0.52 |
|                       | S371         | Induces activity                | –     | –0.54 | –     |
|                       | S411         | Induces activity                | 0.39  | –     | –     |
|                       | S418         | Induces activity                | –     | 1.42  | –     |
|                       | T421         | Induces activity                | –2.15 | –2.29 | –1.07 |
|                       | S424         | Induces activity                | –0.92 | –1.44 | –0.41 |
|                       | T389         | Induces activity                | –     | –     | –1.15 |
| p70S6K $\beta$        | S423         | Induces activity                | 0.75  | 0.44  | 0.73  |
| PDK1                  | S241         | Induces activity                | –     | –     | 1.05  |
| PI3K $\alpha/\gamma$  | T199/467     | Induces activity                | –     | 1.43  | 1.29  |
| PI3K $\alpha$         | T607         | Induces activity                | –     | 0.61  | 1.59  |
| PKC $\zeta$           | T410         | Induces activity                | 0.66  | –     | 0.75  |
|                       | T560         | Induces activity                | 0.72  | –     | 0.45  |
| PP1 $\alpha$          | T320         | Inhibits activity               | 3.89  | 2.61  | 3.34  |
| PP2A $\alpha$         | T307         | Inhibits activity               | –3.72 | –1.18 | –     |
| PTEN                  | S370         | Inhibits activity               | 3.00  | –     | 1.60  |
|                       | S380         | Inhibits activity               | 1.68  | 1.52  | 0.69  |
|                       | S380/382/383 | Inhibits activity               | 3.34  | –     | 0.52  |
| TSC2                  | S939         | Inhibits activity               | –1.74 | –2.11 | –0.54 |
| <i>AMPK signaling</i> |              |                                 |       |       |       |
| AMPK1                 | T174         | Induces activity                | –0.92 | –1.51 | –0.80 |
| AMPK1/2               | S485/491     | Inhibits activity               | –1.07 | –0.82 | –0.63 |
| AMPK $\beta$          | S182         | Regulates cellular localization | –0.77 | –     | –     |
| LKB1                  | T189         | Inhibits activity               | –1.70 | –0.49 | –0.65 |

|                                              |            |                                |       |       |       |
|----------------------------------------------|------------|--------------------------------|-------|-------|-------|
| LKB1                                         | S428       | Induces activity               | 0.62  | –     | –     |
| PKA                                          | T197       | Induces activity               | –     | 0.93  | –     |
| <i>MAPK signaling</i>                        |            |                                |       |       |       |
| c-Raf                                        | S296       | Inhibits activity              | 1.16  | –     | 0.73  |
|                                              | S43        | Inhibits activity              | 0.37  | 0.54  | 0.53  |
| CrkII                                        | Y221       | Inhibits activity              | 2.73  | 0.58  | 2.36  |
| GRB10                                        | T67        | Inhibits molecular association | –     | –     | 1.15  |
| ERK1                                         | T202       | Induces activity               | –     | -1.19 | –     |
|                                              | Y204       | Induces activity               | -0.39 | -0.66 | –     |
| ERK3                                         | S189       | Induces molecular association  | 0.75  | –     | 0.57  |
| MEK1                                         | S217       | Induces activity               | -0.67 | -1.31 | –     |
|                                              | S221       | Induces activity               | –     | -0.48 | -0.37 |
|                                              | T286       | Inhibits activity              | 0.59  | –     | 0.89  |
|                                              | T291       | Inhibits activity              | 0.90  | –     | 1.56  |
|                                              | S298       | Induces activity               | -1.56 | -0.32 | –     |
| MEK2                                         | T394       | Inhibits activity              | 0.84  | 0.44  | 1.29  |
| Ras-GRF                                      | S916       | Induces activity               | 0.49  | –     | 0.99  |
| <i>IKK-NF-<math>\kappa</math>B signaling</i> |            |                                |       |       |       |
| IKK $\alpha$                                 | T23        | Induces activity               | –     | -0.65 | -0.78 |
| IKK $\alpha/\beta$                           | S180/181   | Induces activity               | -1.38 | -0.32 | -0.64 |
| IKK $\gamma$                                 | S31        | Induces transcription          | –     | -0.71 | -0.54 |
|                                              | S85        | Induces activity               | -1.31 | –     | -1.15 |
| iNOS                                         | Expression |                                | -0.78 | –     | –     |
| PKC $\theta$                                 | T538       | Induces activity               | -2.26 | -1.64 | -1.38 |
|                                              | S676       | Induces activity               | -0.39 | -0.48 | –     |
| TNFR1                                        | Expression |                                | -1.14 | -0.93 | –     |
| TNFR2                                        | Expression |                                | –     | –     | -0.38 |
